# Supplementary material for: Complex DNA sequence readout mechanisms of the DNMT3B DNA methyltransferase
Source: PubMed Central journal article supplement — Nucleic Acids Res. 2020 Oct 26;48(20):11495–509. doi: 10.1093/nar/gkaa938 (PMC7672481; doi:10.1093/nar/gkaa938), 2020-10-26
Supplement: gkaa938_supplemental_file.pdf [file gkaa938_supplemental_file.pdf]

# Complex DNA sequence readout mechanisms of the DNMT3B DNA methyltransferase

Michael Dukatz, Sabrina Adam, Mahamaya Biswal, Jikui Song, Pavel Bashtrykov, & Albert Jeltsch

## SUPPLEMENTARY INFORMATION

### Supplementary Figures

Supplementary Figure S1: Structural snapshots showing the contacts of the residues investigated in this study in three different DNMT3B structures.

Supplementary Figure S2: Example of a Coomassie BB stained SDS-PAGE gel image of the purified proteins used in this study.

Supplementary Figure S3: Controls related to the global base enrichment and depletion analysis.

Supplementary Figure S4: Controls related to the NNCXNN base enrichment and depletion analysis for WT DNMT3B.

Supplementary Figure S5: Flanking sequence preferences of WT DNMT3B in CpG and non-CpG methylation.

Supplementary Figure S6: Pairwise correlation of the flank profiles determined in the individual repeats of the CpG methylation experiments of WT and mutant DNMT3B.

Supplementary Figure S7: Comparison of the enrichment and depletion of bases in the -4 to +4 flank region of CpG substrates methylated by WT DNMT3B and R823A.

Supplementary Figure S8: Boxplot of the ranks of the CpG sites in the human SatII repeat (n=67) and murine minor satellite repeat (n=11) in the NNNCGNNN flanking preferences of human and mouse DNMT3B and DNMT3A.

### Supplementary Tables

Supplementary Table S1: Compilation of DNMT3B-DNA structures used in this work.

Supplementary Table S2: DNA contacts of the DNMT3B amino acid residues studied in this work.

Supplementary Table S3: Protein contacts of the residues studied in this work.

Supplementary Table S4: Summary of the NGS sequencing data used in this study.

### Supplementary References

Supplementary Figure S1.

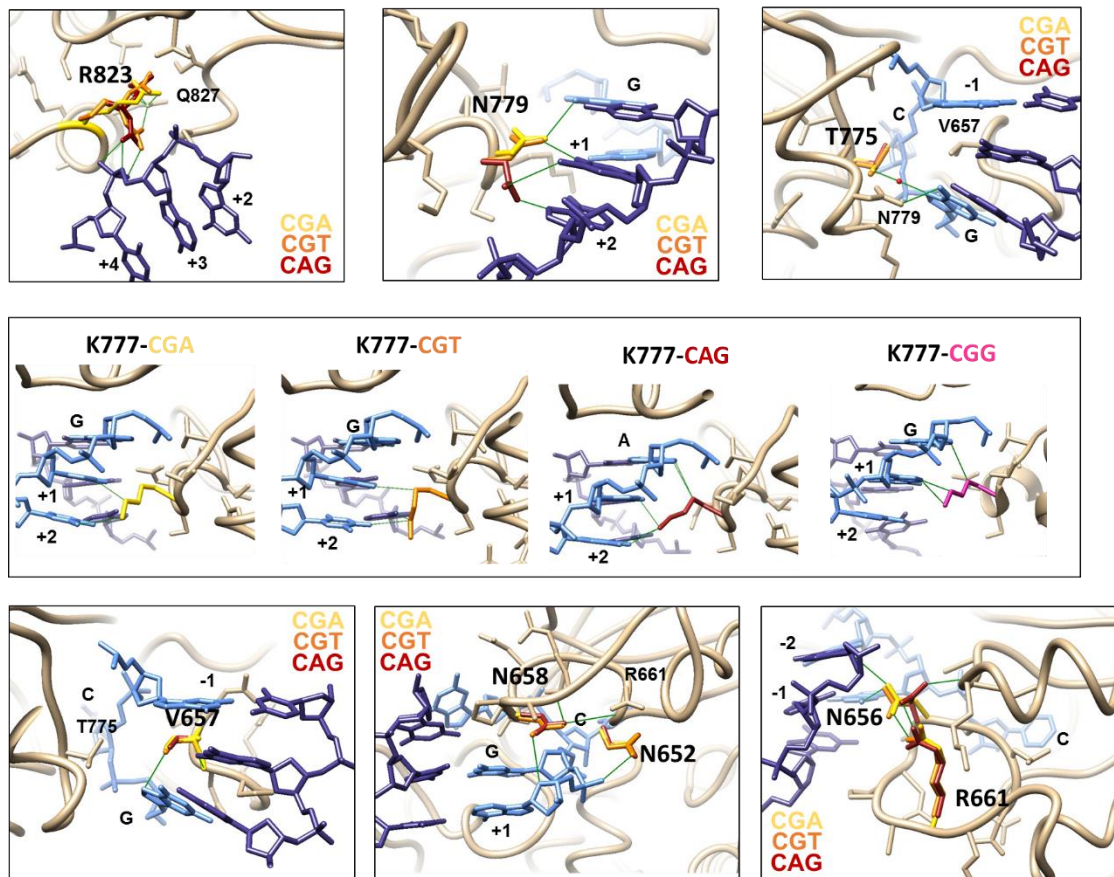

Structural snapshots showing the contacts of the residues investigated in this study in three different DNMT3B structures (CGA, CGT, CAG, see Supplementary Table S1). Green lines refer to contact distances smaller than 4 Å.

Supplementary Figure S2.

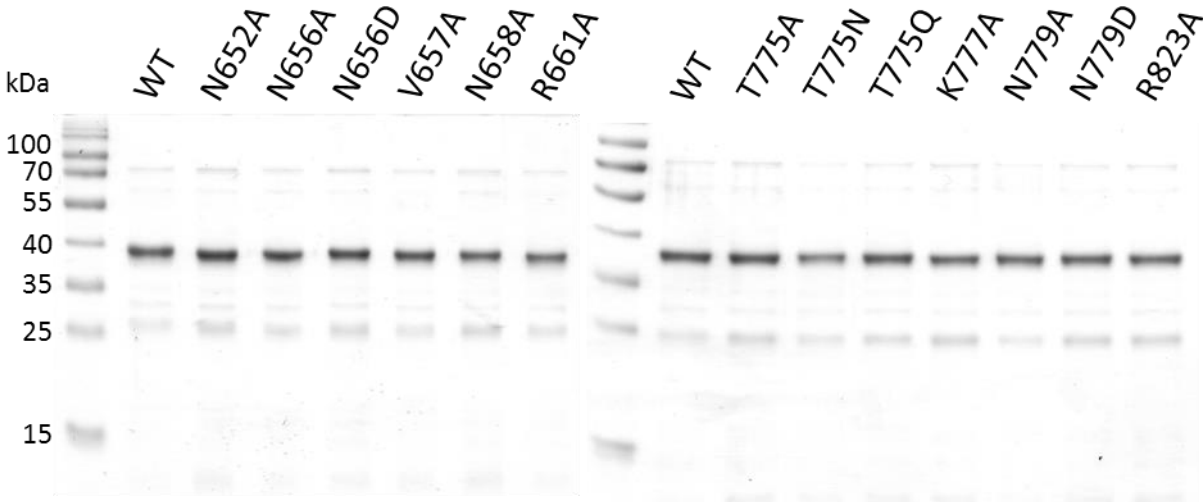

Example of a Coomassie BB stained SDS-PAGE gel image of the purified proteins used in this study.

### Supplementary Figure S3.

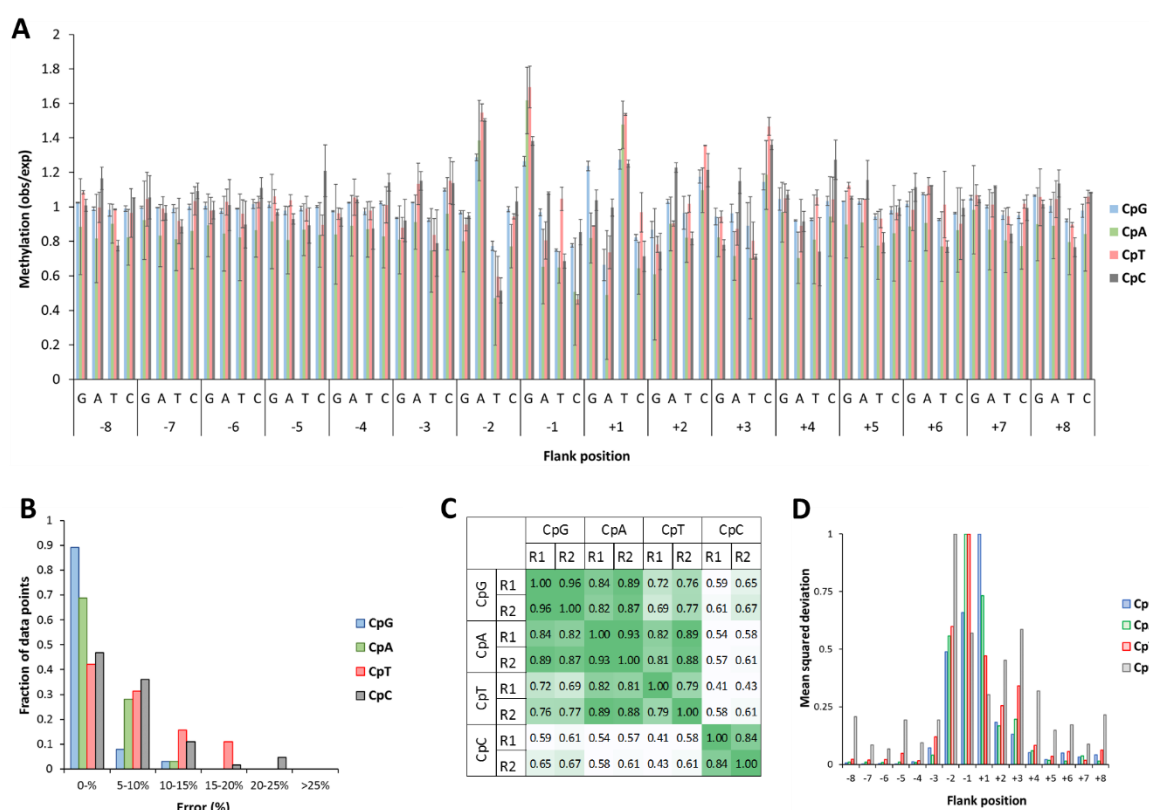

Controls related to the global base enrichment and depletion analysis. **(A)** Compilation of the averaged frequencies of each base at the -8 to +8 flank site. The error bars display the SD of the two measurements. **(B)** Histogram of the distribution of error levels (in %) among the data points. Note that in the CpG and CpA data sets >98% of the points have error margins below 10%. For the CpT and CpC data sets with lower overall methylation relative errors are larger, but even here >90% of the data points have errors below 10% and only one data point had an error above 20% (25%). **(C)** Pairwise correlation of the flank profiles determined in the individual repeats (R1 and R2) of the methylation experiments illustrating the high similarity of the experimental repeats. Shown are Pearson correlation factors. **(D)** Measurement of the position specific variance. For the averaged CpG, CpA, CpT and CpC data sets, the squared values of the deviation of the base frequencies from 0.25 were averaged for all -8 to +8 flank positions and plotted scaled to the largest value. The data show that the -2 to +3 flank positions have the largest influence on the methylation rate.

Supplementary Figure S4.

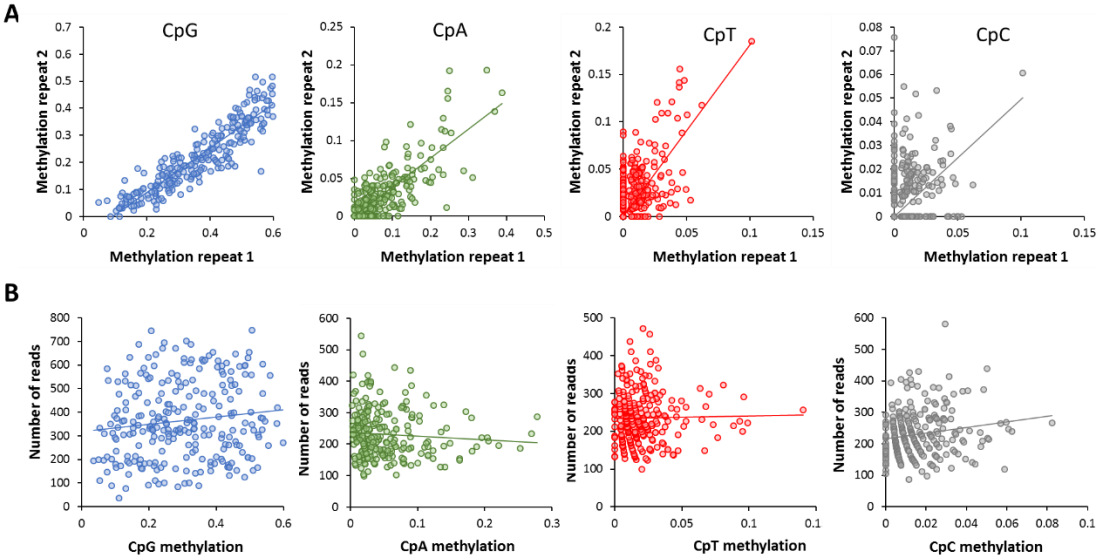

Controls related to the NNCXNN base enrichment and depletion analysis for WT DNMT3B. **(A)** Correlation of NNCXNN methylation levels observed in the two experimental repeats. **(B)** Lack of correlation of methylation levels with the number of reads observed for the corresponding bin.

### Supplementary Figure S5.

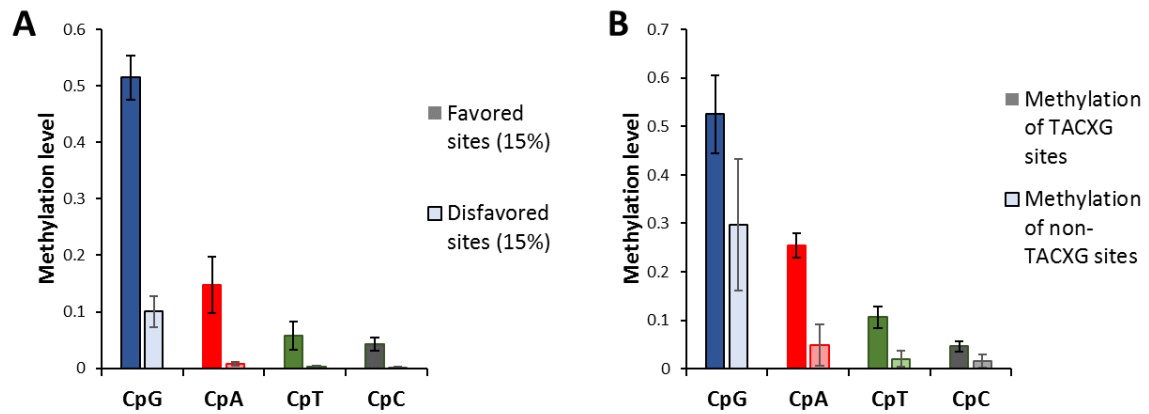

Flanking sequence preferences of WT DNMT3B in CpG and non-CpG methylation. **(A)** Average methylation rate of the 15% of the most preferred and most disfavored flanking sequences. Note the stronger flanking sequence effects in non-CpG methylation. Error bars show the SD. **(B)** Preference for TACXG sequences in non-CpG methylation. Note the elevated preference in CpA and CpT sequence context.

### Supplementary Figure S6.

|       |    | WT   |      | N652A |      | N656A |       | N656D |       | V657A |      | N658A |       | R661A |      | K777A |       | N779A |      | N779D |       | R823A |       |
|-------|----|------|------|-------|------|-------|-------|-------|-------|-------|------|-------|-------|-------|------|-------|-------|-------|------|-------|-------|-------|-------|
|       |    | R1   | R2   | R1    | R2   | R1    | R2    | R1    | R2    | R1    | R2   | R1    | R2    | R1    | R2   | R1    | R2    | R1    | R2   | R1    | R2    | R1    | R2    |
| WT    | R1 | 1.00 | 0.96 | 0.95  | 0.95 | 0.86  | 0.86  | 0.77  | 0.77  | 0.96  | 0.96 | 0.90  | 0.92  | 0.85  | 0.86 | 0.00  | 0.04  | 0.84  | 0.85 | 0.58  | 0.57  | 0.95  | 0.95  |
|       | R2 | 0.96 | 1.00 | 0.95  | 0.94 | 0.81  | 0.83  | 0.76  | 0.76  | 0.94  | 0.95 | 0.85  | 0.88  | 0.87  | 0.87 | 0.09  | 0.11  | 0.80  | 0.84 | 0.50  | 0.50  | 0.94  | 0.93  |
| N652A | R1 | 0.95 | 0.95 | 1.00  | 0.97 | 0.83  | 0.84  | 0.77  | 0.78  | 0.96  | 0.96 | 0.90  | 0.92  | 0.85  | 0.86 | 0.11  | 0.14  | 0.83  | 0.86 | 0.55  | 0.55  | 0.94  | 0.93  |
|       | R2 | 0.95 | 0.94 | 0.97  | 1.00 | 0.84  | 0.84  | 0.79  | 0.79  | 0.95  | 0.95 | 0.90  | 0.92  | 0.86  | 0.88 | 0.12  | 0.17  | 0.84  | 0.87 | 0.58  | 0.57  | 0.94  | 0.93  |
| N656A | R1 | 0.86 | 0.81 | 0.83  | 0.84 | 1.00  | 0.98  | 0.65  | 0.65  | 0.84  | 0.84 | 0.84  | 0.87  | 0.80  | 0.79 | -0.04 | 0.00  | 0.98  | 0.96 | 0.83  | 0.83  | 0.80  | 0.79  |
|       | R2 | 0.86 | 0.83 | 0.84  | 0.84 | 0.98  | 1.00  | 0.67  | 0.66  | 0.85  | 0.85 | 0.85  | 0.87  | 0.82  | 0.80 | -0.04 | -0.01 | 0.97  | 0.96 | 0.82  | 0.81  | 0.81  | 0.80  |
| N656D | R1 | 0.77 | 0.76 | 0.77  | 0.79 | 0.65  | 0.67  | 1.00  | 0.98  | 0.73  | 0.77 | 0.73  | 0.74  | 0.87  | 0.88 | -0.15 | -0.11 | 0.63  | 0.64 | 0.38  | 0.39  | 0.82  | 0.82  |
|       | R2 | 0.77 | 0.76 | 0.78  | 0.79 | 0.65  | 0.66  | 0.98  | 1.00  | 0.74  | 0.78 | 0.74  | 0.73  | 0.87  | 0.88 | -0.15 | -0.12 | 0.63  | 0.64 | 0.39  | 0.39  | 0.82  | 0.83  |
| V657A | R1 | 0.96 | 0.94 | 0.96  | 0.95 | 0.84  | 0.85  | 0.73  | 0.74  | 1.00  | 0.98 | 0.86  | 0.87  | 0.82  | 0.83 | 0.08  | 0.13  | 0.84  | 0.85 | 0.56  | 0.55  | 0.96  | 0.94  |
|       | R2 | 0.96 | 0.95 | 0.96  | 0.95 | 0.84  | 0.85  | 0.77  | 0.78  | 0.98  | 1.00 | 0.87  | 0.89  | 0.83  | 0.85 | 0.08  | 0.12  | 0.84  | 0.85 | 0.56  | 0.55  | 0.96  | 0.95  |
| N658A | R1 | 0.90 | 0.85 | 0.90  | 0.90 | 0.84  | 0.85  | 0.73  | 0.74  | 0.86  | 0.87 | 1.00  | 0.96  | 0.78  | 0.77 | -0.13 | -0.09 | 0.84  | 0.82 | 0.66  | 0.68  | 0.88  | 0.88  |
|       | R2 | 0.92 | 0.88 | 0.92  | 0.92 | 0.87  | 0.87  | 0.74  | 0.73  | 0.87  | 0.89 | 0.96  | 1.00  | 0.80  | 0.80 | -0.04 | -0.01 | 0.86  | 0.86 | 0.67  | 0.70  | 0.89  | 0.89  |
| R661A | R1 | 0.85 | 0.87 | 0.85  | 0.86 | 0.80  | 0.82  | 0.87  | 0.87  | 0.82  | 0.83 | 0.78  | 0.80  | 1.00  | 0.97 | -0.02 | 0.02  | 0.79  | 0.81 | 0.54  | 0.53  | 0.84  | 0.83  |
|       | R2 | 0.86 | 0.87 | 0.86  | 0.88 | 0.79  | 0.80  | 0.88  | 0.88  | 0.83  | 0.85 | 0.77  | 0.80  | 0.97  | 1.00 | 0.03  | 0.07  | 0.77  | 0.80 | 0.53  | 0.51  | 0.85  | 0.85  |
| K777A | R1 | 0.00 | 0.09 | 0.11  | 0.12 | -0.04 | -0.04 | -0.15 | -0.15 | 0.08  | 0.08 | -0.13 | -0.04 | -0.02 | 0.03 | 1.00  | 0.97  | -0.01 | 0.06 | -0.10 | -0.11 | 0.01  | -0.02 |
|       | R2 | 0.04 | 0.11 | 0.14  | 0.17 | 0.00  | -0.01 | -0.11 | -0.12 | 0.13  | 0.12 | -0.09 | -0.01 | 0.02  | 0.07 | 0.97  | 1.00  | 0.02  | 0.09 | -0.08 | -0.09 | 0.05  | 0.02  |
| N779A | R1 | 0.84 | 0.80 | 0.83  | 0.84 | 0.98  | 0.97  | 0.63  | 0.63  | 0.84  | 0.84 | 0.84  | 0.86  | 0.79  | 0.77 | -0.01 | 0.02  | 1.00  | 0.97 | 0.84  | 0.83  | 0.79  | 0.78  |
|       | R2 | 0.85 | 0.84 | 0.86  | 0.87 | 0.96  | 0.96  | 0.64  | 0.64  | 0.85  | 0.85 | 0.82  | 0.86  | 0.81  | 0.80 | 0.06  | 0.09  | 0.97  | 1.00 | 0.78  | 0.78  | 0.80  | 0.79  |
| N779D | R1 | 0.58 | 0.50 | 0.55  | 0.58 | 0.83  | 0.82  | 0.38  | 0.39  | 0.56  | 0.56 | 0.66  | 0.67  | 0.54  | 0.53 | -0.10 | -0.08 | 0.84  | 0.78 | 1.00  | 0.95  | 0.52  | 0.52  |
|       | R2 | 0.57 | 0.50 | 0.55  | 0.57 | 0.83  | 0.81  | 0.39  | 0.39  | 0.55  | 0.55 | 0.68  | 0.70  | 0.53  | 0.51 | -0.11 | -0.09 | 0.83  | 0.78 | 0.95  | 1.00  | 0.52  | 0.52  |
| R823A | R1 | 0.95 | 0.94 | 0.94  | 0.94 | 0.80  | 0.81  | 0.82  | 0.82  | 0.96  | 0.96 | 0.88  | 0.89  | 0.84  | 0.85 | 0.01  | 0.05  | 0.79  | 0.80 | 0.52  | 0.52  | 1.00  | 0.98  |
|       | R2 | 0.95 | 0.93 | 0.93  | 0.93 | 0.79  | 0.80  | 0.82  | 0.83  | 0.94  | 0.95 | 0.88  | 0.89  | 0.83  | 0.85 | -0.02 | 0.02  | 0.78  | 0.79 | 0.52  | 0.52  | 0.98  | 1.00  |

Pairwise correlation of the flank profiles determined in the individual repeats of the CpG methylation experiments of WT and mutant DNMT3B. The data illustrate the high similarity of the experimental repeats. Shown are Pearson correlation factors.

Supplementary Figure S7.

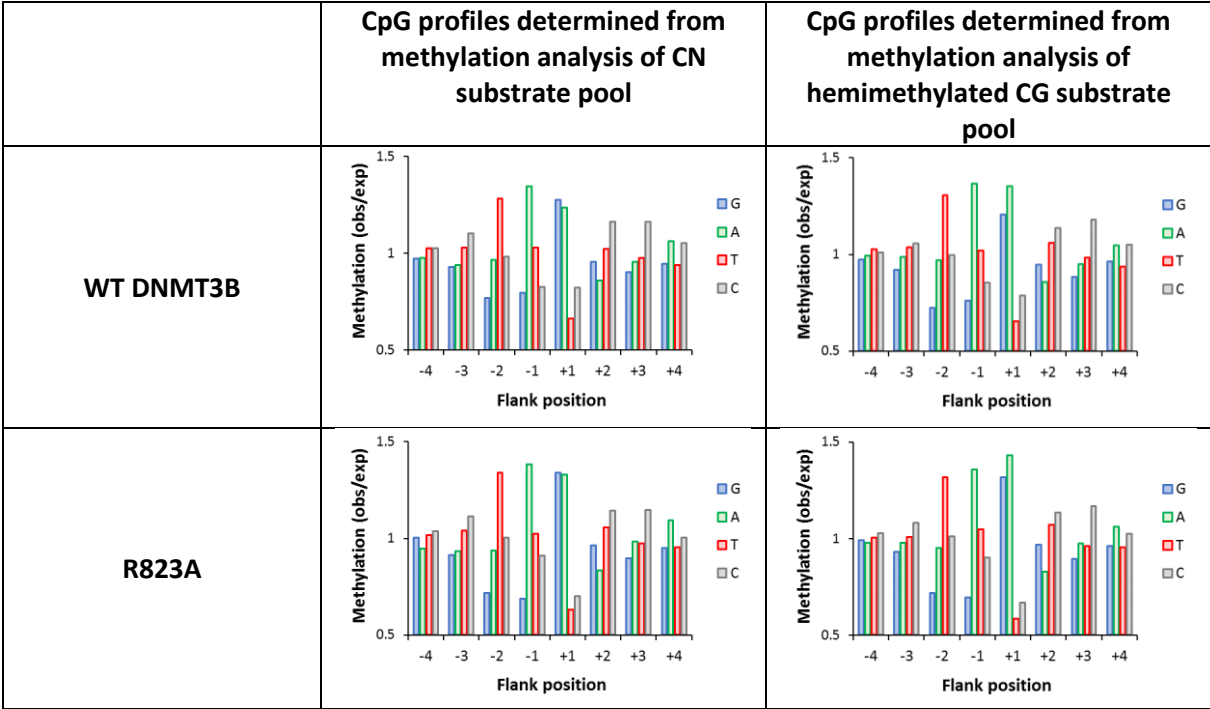

Comparison of the enrichment and depletion of bases in the -4 to +4 flank region of CpG substrates methylated by WT DNMT3B and R823A. The figure shows the N4 flanking preference profiles determined in the analysis of the methylation of CN substrate pools (taken from Figure 5) and of hemimethylated CpG substrate pools.



Supplementary Figure S8.

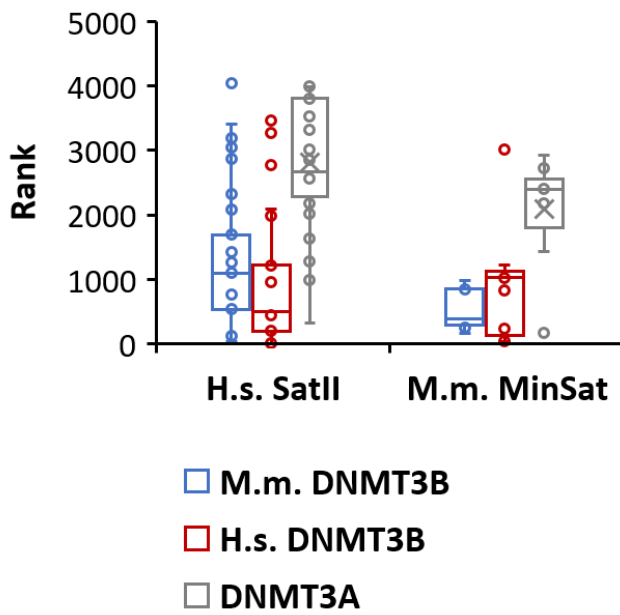

Boxplot of the ranks of the CpG sites in the human SatII repeat (n=67) and murine minor satellite repeat (n=11) in the NNCGNNN flanking preferences of human and mouse DNMT3B and DNMT3A. A low rank indicates high preference. The boxes display the 1<sup>st</sup> and 3<sup>rd</sup> quartiles with medians indicated by vertical lines. Whiskers display the data range. Murine DNMT3B and DNMT3A data were taken from (1). Note that DNMT3A disfavors both sequences.

## Supplementary Tables

**Supplementary Table S1: Compilation of DNMT3B-DNA structures used in this work.**

| <b>Name of complex</b> | <b>DNA sequence context</b> | <b>PDB number</b> | <b>Reference</b> |
|------------------------|-----------------------------|-------------------|------------------|
| <b>CGA</b>             | CATG <u>CG</u> ATCT         | 6U8P              | Gao et al., 2020 |
| <b>CGT</b>             | CATG <u>CG</u> TTCT         | 6U8V              | Gao et al., 2020 |
| <b>CAG</b>             | CATG <u>CAG</u> TCT         | 6U8X              | Gao et al., 2020 |
| <b>CGG</b>             | AAT <u>T</u> CGGAAA         | 6KDA              | Lin et al., 2020 |
| <b>CGT2</b>            | CATG <u>CG</u> TTCT         | 6KDB              | Lin et al., 2020 |

**Supplementary Table S2: DNA contacts of the DNMT3B amino acid residues studied in this work.**  
Numbers refer to atom distances in Å.

| Residue     | Position | CGA complex                                                                                | CGT complex                                                                                | CAG complex                                                                                |
|-------------|----------|--------------------------------------------------------------------------------------------|--------------------------------------------------------------------------------------------|--------------------------------------------------------------------------------------------|
| <b>N652</b> | +1       | Ade-OP1 N652-ND2 3.2                                                                       | Ade-OP1 N652-ND2 3.3                                                                       | Ade-OP1 N652-ND2 3.2                                                                       |
| <b>N656</b> | -2       | Ade'-O4' N656-ND2 4.3                                                                      | Ade'-N3 N656-ND2 3.9                                                                       | Ade'-O4' N656-OD1 4.1                                                                      |
|             | -1       | Gua-N2 N656-ND2 3.7<br>Cyt'-O2 N656-ND2 4.4                                                | Gua-N2 N656-ND2 3.7<br>Cyt'-O2 N656-ND2 4.3                                                |                                                                                            |
| <b>V657</b> | -1       |                                                                                            | Gua-C1' V657-CG 3.8<br>Gua C2' V657-CG 3.8                                                 |                                                                                            |
|             | Target C | Gua'-N2 V657-O 3.3<br>Gua'-N3 V657-O 3.7                                                   | Gua'-N2 V657-O 3.3<br>Gua'-N3 V657-O 4.3                                                   | Gua'-N2 V657-O 3.3<br>Gua'-N3 V657-O 4.3                                                   |
|             | CpN site | Gua-N2 V657-CG 3.7<br>Gua-N7 V657-CG 3.4<br>Gua-C5' V657-CG 3.5                            | Gua-N3 V657-O 3.8                                                                          | Ade-N7 V657-CG 3.5                                                                         |
| <b>N658</b> | CpN site | Gua-O3' N658-ND2 4.3<br>Gua-O4' N658-ND2 4.4<br>Gua-N3 N658-OD1 4.4<br>Gua-N7 N658-OD1 4.4 | Gua-O3' N658-ND2 4.1<br>Gua-O4' N658-ND2 4.2<br>Gua-N3 N658-OD1 4.6<br>Gua-N7 N658-OD1 4.5 | Ade-O3' N658-ND2 4.4<br>Ade-O4' N658-ND2 4.1<br>Ade-N3 N658-ND2 4.6<br>Ade-N7 N658-OD1 4.5 |
|             | +1       | Ade-O4' N658-ND2 3.9                                                                       | Thy-O4' N658-OD2 3.8                                                                       | Gua-O4' N658-ND2 3.8                                                                       |
| <b>T775</b> | Target C | Gua-C2' T775-CG2 4.1<br>Gua-C3' T775-CG2 4.4                                               | Gua-C2' T775-CG2 4.1<br>Gua-C3' T775-CG2 4.4                                               | Gua-C2' T775-CG2 4.2<br>Gua-C3' T775-CG2 4.5                                               |
|             | CpN site | Gua-N7 T775-OG1 4.4                                                                        | Gua-N7 T775-OG1 4.5                                                                        | Ade-N7 T775-OG1 4.5                                                                        |
| <b>K777</b> | CpN site | Gua-N7 K777-CG 4.1<br>Gua-C8 K777-CG 4.1                                                   | Gua-C8 K777-CG 4.4                                                                         | Ade-N7 K777-CG 3.7<br>Ade-C8 K777-CG 3.7                                                   |
|             | +1       | Ade-N7 K777-CE 3.3<br>Ade-N6 K777-CG 3.9                                                   | Thy-C7 K777-CG 3.5                                                                         | Gua-N7 K777-NZ 3.1<br>Gua-O6 K777-NZ 4.1                                                   |
|             | +2       | Thy-O4 K777-NZ 4.4<br>Thy-C7 K777-NZ 3.8                                                   | Ade'-N6K777-CE 3.6<br>Thy-O4 K777-CE 3.6                                                   | Thy-O4 K777-NZ 3.5<br>Thy-C7 K777-NZ 3.7                                                   |
|             | +3       |                                                                                            | Gua'-O6 K777-NZ 4.5<br>Gua'-N7 K777-NZ 4.8                                                 |                                                                                            |
| <b>N779</b> | CpN site | Gua-O6 N779-ND2 3.2<br>Cyt'-N4 N779-ND2 4.1                                                | Gua-O6 N779-ND2 2.9<br>Cyt'-N4 N779-ND2 4.3                                                |                                                                                            |
|             | +1       | Ade-N6 N779-ND2 3.8<br>Thy'-O4 N779-ND2 2.8                                                | Thy-O4 N779 ND2 5.0<br>Ade'-N6 N779ND2 3.6                                                 |                                                                                            |
|             | +2       | Ade'-N6 N779-ND2 4.3                                                                       | Ade'-N6 N779-ND2 4.5                                                                       | Ade'-N7 N779-ND2 3.9<br>Ade'-OP2 N779-OD1 3.5                                              |
| <b>R823</b> | +3       | Gua'-OP1 R823-NE 4.5                                                                       | Gua'-OP1 R823-NZ 4.0                                                                       | Gua'-OP1 R823-NE 4.5                                                                       |
|             | +4       | Ade' OP2 R823-N 4.3                                                                        | Ade' OP2 R823-N 4.3<br>R823-NZ 2.6<br>Ade'-O5' R823-NZ 3.3                                 | Ade' OP2 R823-N 4.5<br>R823-NZ 3.4<br>Ade'-O5' R823-NZ 2.7                                 |

**Supplementary Table S3: Protein contacts of the residues studied in this work.** Numbers refer to atom distances in Å.

| <b>Residue 1</b> | <b>Residue 2</b> | <b>Atom 1</b> | <b>Atom 2</b> | <b>CGA</b> | <b>CGT</b> | <b>CAG</b> |
|------------------|------------------|---------------|---------------|------------|------------|------------|
| <b>N652</b>      | <b>N658</b>      | N652-ND2      | N658-N        | 2.7        | 2.7        | 2.7        |
| <b>N656</b>      | <b>N658</b>      | N652-ND2      | N658-N        | 2.7        | 2.7        | 2.7        |
|                  | <b>R661</b>      | N656- OD1     | R661- NH2     | 2.6        | 2.6        | 2.7        |
|                  | <b>M703</b>      | N656- ND2     | M703-N        |            |            | 3.5        |
| <b>V657</b>      | <b>T775</b>      | V657-CG2      | T775-CG2      | 4.9        | 4.9        | 5.3        |
| <b>N658</b>      | <b>R661</b>      | N658-O        | R661-NH2      | 3.8        | 4.1        | 3.5        |
| <b>T775</b>      | <b>K777</b>      | T775-OG1      | K777-O        | OG1 3.8    | 3.7        | 3.9        |
|                  |                  | T775-OG1      | K777-N        | OG1 3.6    | 3.6        | 3.4        |
|                  | <b>N779</b>      | T775-OG1      | N779-OD1      | 4.1        | 3.9        |            |

**Supplementary Table S4: Summary of the NGS sequencing data used in this study.**

| Enzyme    | Sequence context | Concentration [ $\mu\text{M}$ ] | Number of reads | Average methylation (%) |
|-----------|------------------|---------------------------------|-----------------|-------------------------|
| DNMT3B WT | CG               | 0.5                             | 47424           | 23.7                    |
|           |                  | 1                               | 45734           | 38.3                    |
|           | CA               | 0.5                             | 30213           | 2.9                     |
|           |                  | 1                               | 28040           | 7.4                     |
|           | CT               | 0.5                             | 30729           | 1.1                     |
|           |                  | 1                               | 28670           | 3.2                     |
|           | CC               | 0.5                             | 31270           | 1.1                     |
|           |                  | 1                               | 27576           | 2.4                     |
|           | HM CG            | 0.5                             | 909803          | 11.6                    |
|           |                  | 1                               | 631992          | 37.9                    |
| N652A     | CG               | 1                               | 12608           | 36.1                    |
|           |                  | 2                               | 31551           | 44.8                    |
|           | CA               | 1                               | 12162           | 6.1                     |
|           |                  | 2                               | 30009           | 10.3                    |
|           | CT               | 1                               | 12069           | 1.9                     |
|           |                  | 2                               | 27703           | 3.2                     |
|           | CC               | 1                               | 12721           | 1.7                     |
|           |                  | 2                               | 31881           | 2.4                     |
| N656A     | CG               | 0.5                             | 40523           | 17.9                    |
|           |                  | 1                               | 27707           | 28.1                    |
|           | CA               | 0.5                             | 25768           | 3.6                     |
|           |                  | 1                               | 17644           | 7.3                     |
|           | CT               | 0.5                             | 26365           | 1.3                     |
|           |                  | 1                               | 17963           | 2.7                     |
|           | CC               | 0.5                             | 27368           | 1.0                     |
|           |                  | 1                               | 18290           | 2.0                     |
| N656D     | CG               | 5                               | 42586           | 11.4                    |
|           |                  | 10                              | 44724           | 12.2                    |
|           | CA               | 5                               | 26889           | 1.0                     |
|           |                  | 10                              | 27554           | 1.3                     |
|           | CT               | 5                               | 26735           | 0.6                     |
|           |                  | 10                              | 27541           | 0.6                     |
|           | CC               | 5                               | 29128           | 0.7                     |
|           |                  | 10                              | 29519           | 0.9                     |
| V657A     | CG               | 1                               | 32673           | 37.8                    |
|           |                  | 2                               | 30748           | 43.6                    |
|           | CA               | 1                               | 31013           | 4.5                     |
|           |                  | 2                               | 28644           | 7.6                     |
|           | CT               | 1                               | 28541           | 5.8                     |
|           |                  | 2                               | 26911           | 9.2                     |
|           | CC               | 1                               | 32625           | 2.0                     |
|           |                  | 2                               | 30436           | 3.7                     |
| N658A     | CG               | 3                               | 20296           | 16.0                    |
|           |                  | 6                               | 22440           | 20.3                    |
|           | CA               | 3                               | 20562           | 4.6                     |
|           |                  | 6                               | 22497           | 6.1                     |
|           | CT               | 3                               | 19487           | 1.2                     |
|           |                  | 6                               | 20793           | 1.4                     |
|           | CC               | 3                               | 21376           | 0.9                     |
|           |                  | 6                               | 23573           | 0.9                     |
| R661A     | CG               | 1.5                             | 37235           | 29.2                    |
|           |                  | 3                               | 44184           | 39.2                    |
|           | CA               | 1.5                             | 23343           | 5.3                     |
|           |                  | 3                               | 26909           | 7.7                     |
|           | CT               | 1.5                             | 23548           | 2.5                     |
|           |                  | 3                               | 27043           | 3.6                     |
|           | CC               | 1.5                             | 24091           | 1.7                     |
|           |                  | 3                               | 27464           | 2.3                     |
| K777A     | CG               | 1                               | 11839           | 48.3                    |
|           |                  | 2                               | 13262           | 56.8                    |
|           | CA               | 1                               | 9236            | 16.3                    |
|           |                  | 2                               | 9882            | 24.2                    |
|           | CT               | 1                               | 9308            | 4.1                     |
|           |                  | 2                               | 9595            | 8.1                     |

|              |                  |       |        |       |
|--------------|------------------|-------|--------|-------|
|              | CC               | 1     | 9817   | 6.3   |
|              |                  | 2     | 10730  | 10.6  |
| <b>N779A</b> | CG               | 0.5   | 42293  | 26.1  |
|              |                  | 1     | 40945  | 34.0  |
|              | CA               | 0.5   | 26360  | 5.3   |
|              |                  | 1     | 25258  | 9.8   |
|              | CT               | 0.5   | 26428  | 1.6   |
|              |                  | 1     | 25223  | 3.7   |
| CC           | 0.5              | 27770 | 1.3    |       |
|              | 1                | 26154 | 2.8    |       |
| <b>N779D</b> | CG               | 0.5   | 18340  | 11.5  |
|              |                  | 1     | 20120  | 25.7  |
|              | CA               | 0.5   | 18300  | 2.3   |
|              |                  | 1     | 19489  | 5.8   |
|              | CT               | 0.5   | 17274  | 0.6   |
|              |                  | 1     | 18573  | 1.7   |
|              | CC               | 0.5   | 19883  | 1.0   |
|              |                  | 1     | 20698  | 1.9   |
| <b>R823A</b> | CG               | 1.5   | 44328  | 30.7  |
|              |                  | 3     | 38794  | 36.6  |
|              | CA               | 1.5   | 25999  | 3.7   |
|              |                  | 3     | 23440  | 5.8   |
|              | CT               | 1.5   | 25824  | 1.3   |
|              |                  | 3     | 23529  | 1.9   |
|              | CC               | 1.5   | 27690  | 1.3   |
|              |                  | 3     | 24452  | 2.0   |
|              | HM CG            | 3     | 974408 | 23.6  |
|              | <b>no enzyme</b> | CG    |        | 13629 |
| CA           |                  |       | 12608  | 0.6   |
| CT           |                  |       | 12809  | 0.3   |
| CC           |                  |       | 13981  | 0.4   |

## Supplementary References

1. Gao, L., Emperle, M., Guo, Y., Grimm, S.A., Ren, W., Adam, S., Uryu, H., Zhang, Z.M., Chen, D., Yin, J. *et al.* (2020) Comprehensive structure-function characterization of DNMT3B and DNMT3A reveals distinctive de novo DNA methylation mechanisms. *Nature communications*, **11**, 3355.
